# Supplementary material
Source: Springer Nature journal article supplement (https://www.springerprofessional.de/resource/supplementary/13673_2011_15_MOESM8_ESM.pdf/11899340)
Supplement: MOESM8 [file 11899340]

**Algorithm:** Radix-tree Construction

**Input:** Database  $D$ ; minsup

**Output:** Radix-tree  $R$ , ItemList  $IL$ , ItemMap  $IM$

- 1)  $IM \leftarrow 0$
- 2) for each table  $T$  in  $D$
- 3)     for each item  $c$  in  $T$
- 4)         if  $c \in C$
- 5)              $c.counter ++$ ;
- 6)     else
- 7)          $C \leftarrow \{c \mid c.counter \leftarrow 1\}$ ;
- 8)      $IL \leftarrow \{c \mid c.counter \geq minsup\}$ ;
- 9)      $IM \leftarrow \{c \mid c.counter \geq minsup\}$ ;
- 10) for each  $tp$  tuple existent in primary table
- 11)  $FREQ \leftarrow$  frequents items of  $tp$
- 12) for each  $TS$  secondary table
- 13) for each  $ts$  tuple in  $TS$ , such that  $ts.tid=tp.tid$
- 14)  $FREQ \leftarrow$  frequents items of  $ts$
- 15) Create a node for  $FREQ$  items
- 16) Add the node to  $R$
